# Supplementary material for: Molecular mechanism of elemental sulfur dissolution in H2S under stratal conditions
Source: Royal Society of Chemistry journal article supplement (doi:10.1039/d4ra01764a), 2024-01-01
Supplement: d4ra01764a1.pdf [file d4ra01764a1.pdf]

## Supplementary Information

### **Molecular mechanism of elemental sulfur dissolution in H<sub>2</sub>S under stratal conditions**

Sheng Yuan<sup>a</sup>, Ying Wan<sup>b</sup>, Li Wang<sup>b</sup>, Nong Li<sup>b</sup>, Mingli Yang<sup>a</sup>, Shengping Yu<sup>c</sup> and Li Zhang<sup>a,\*</sup>

*<sup>a</sup> Institute of Atomic and Molecular Physics, Sichuan University, Chengdu 610065, China; <sup>b</sup> Research Institute of Exploration and Development, PetroChina Southwest Oil and Gasfield Company, Chengdu 610213, China; <sup>c</sup> Key Laboratory of General Chemistry of the National Ethnic Affairs Commission, School of Chemistry and Environment, Southwest Minzu University, Chengdu 610041, China.*

---

\* Corresponding author  
E-mail addresses: lizhang@scu.edu.cn (Li Zhang)

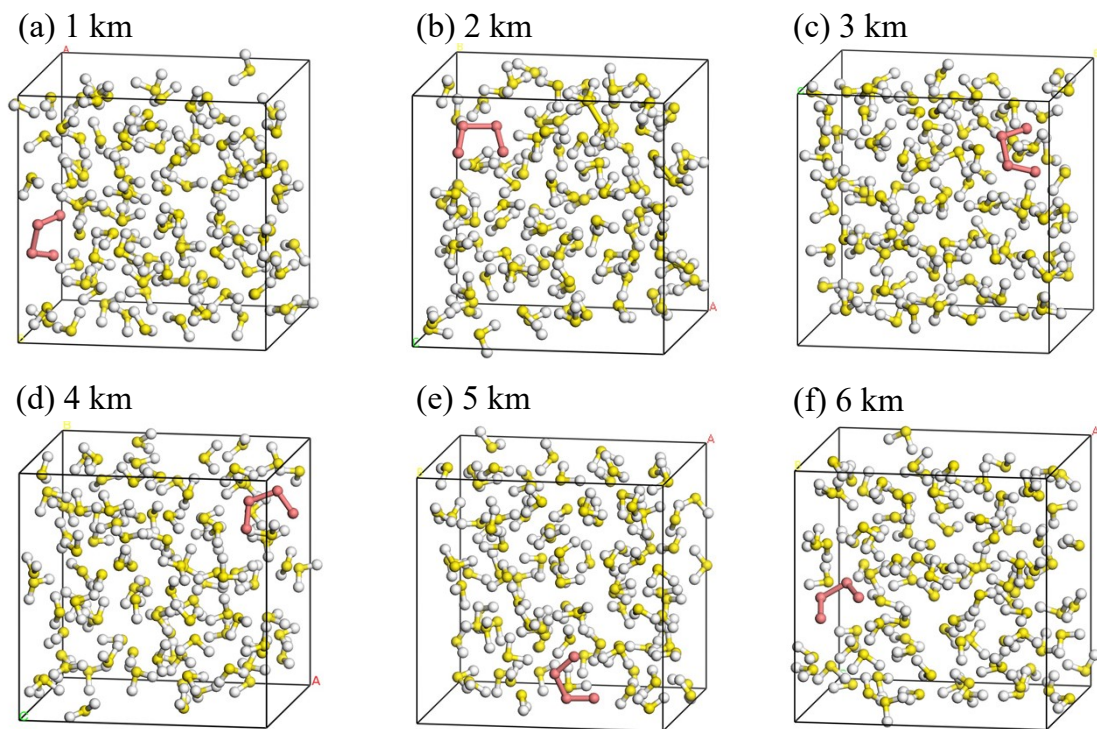

Fig. S1. Snapshots of the molecular configurations of  $S_4$  in  $H_2S$  at a varying stratigraphic depth. (Red balls are for S atoms in  $S_4$ , others for atoms in  $H_2S$ ).

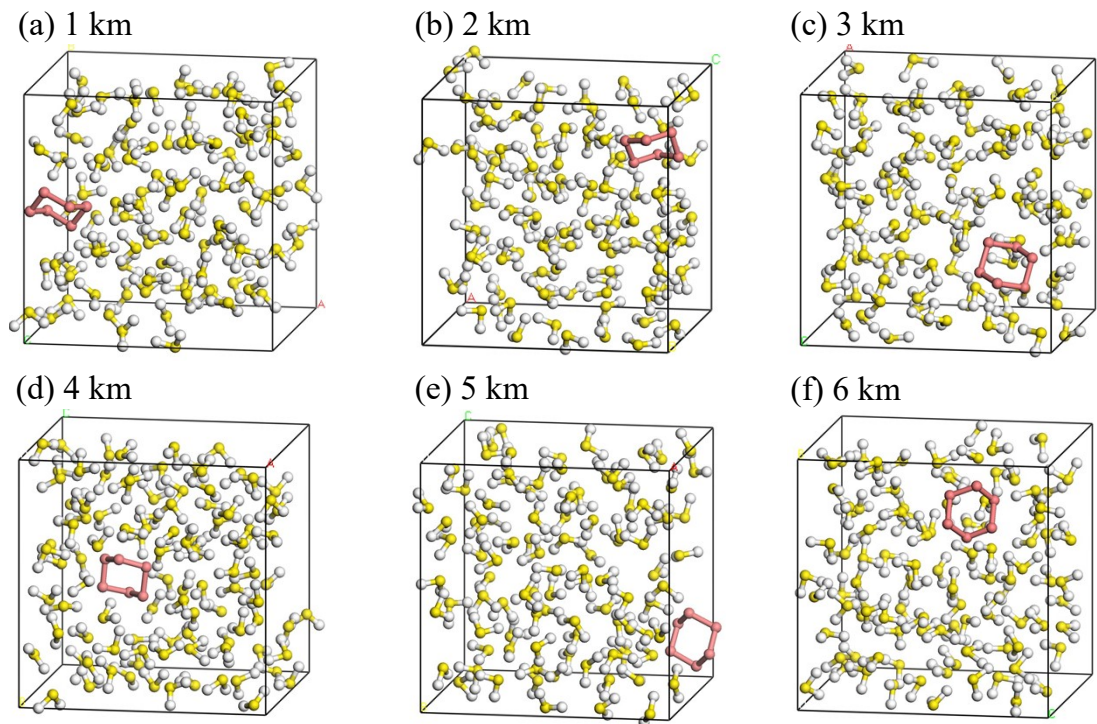

Fig. S2. Snapshots of the molecular configurations of  $S_6$  in  $H_2S$  at a varying stratigraphic depth. (Red balls are for S atoms in  $S_6$ , others for atoms in  $H_2S$ ).

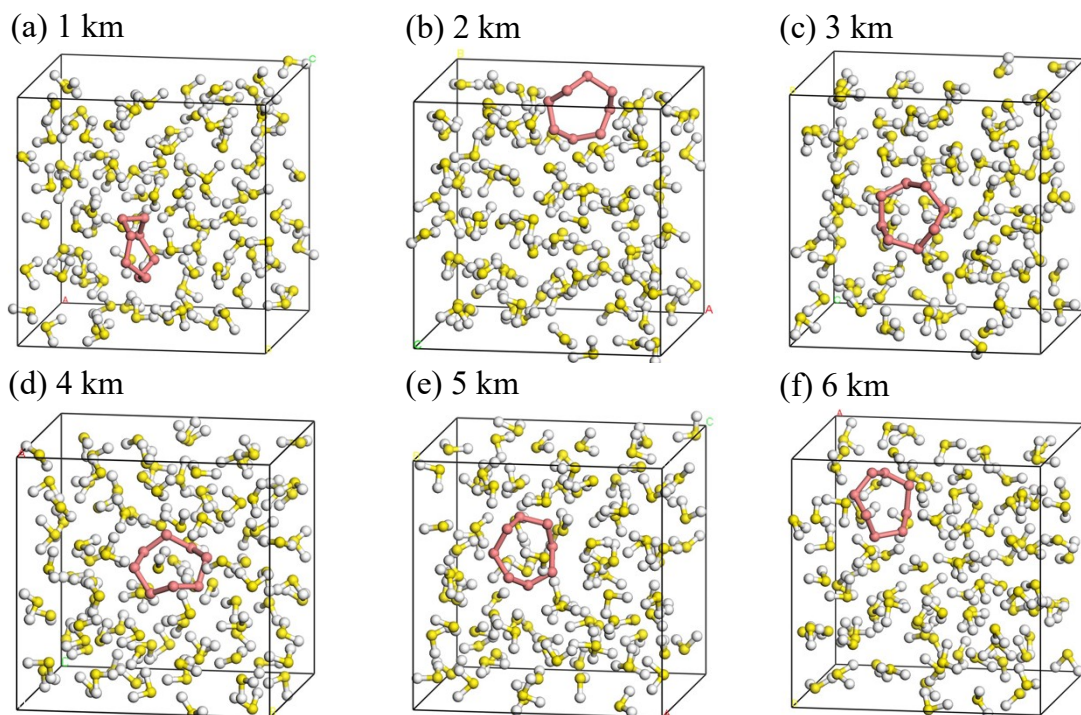

Fig. S3. Snapshots of the molecular configurations of  $S_8$  in  $H_2S$  at a varying stratigraphic depth. (Red balls are for S atoms in  $S_8$ , others for atoms in  $H_2S$ ).

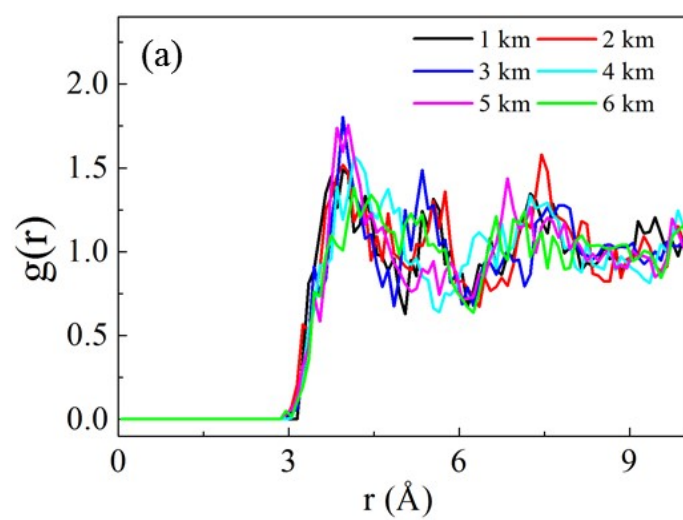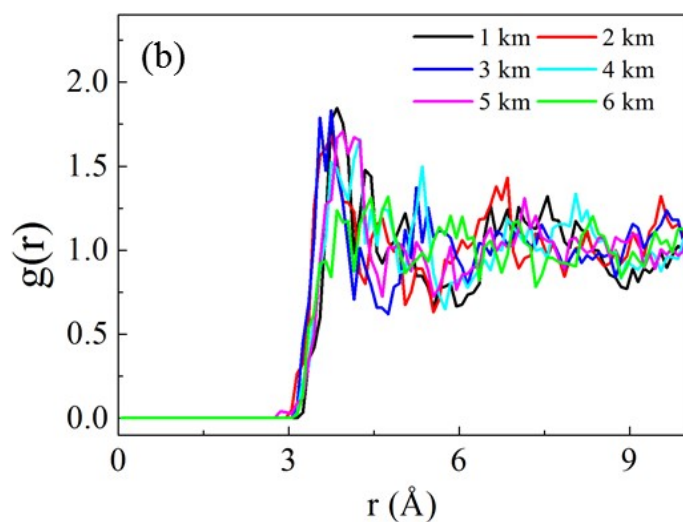

Fig. S4. RDFs of the terminal (a) and central (b) S atoms in  $S_4$  with the S atom in  $H_2S$  at the stratigraphic depths of 1–6 km.

Table S1. Structure and coordinates of  $S_2$  reacting with a  $H_2S$  molecule optimized at the B3LYP/6-311++G(d,p) level. S and T denote the singlet and triplet states, respectively.

| Name             | Structure | Numbering | X        | Y        | Z        |
|------------------|-----------|-----------|----------|----------|----------|
| IM1 <sup>T</sup> |           | 1         | 2.63349  | -0.00026 | 0.000160 |
|                  |           | 2         | 1.70046  | 0.68505  | -0.69003 |
|                  |           | 3         | 1.69900  | -0.68717 | 0.68679  |
|                  |           | 4         | -1.42371 | -0.96330 | -0.03062 |
|                  |           | 5         | -1.42225 | 0.963670 | 0.03066  |
| TS1 <sup>S</sup> |           | 1         | -1.79109 | -0.28772 | -0.05616 |
|                  |           | 2         | -0.50825 | -1.30131 | -0.52196 |
|                  |           | 3         | -1.76447 | -0.83157 | 1.18843  |
|                  |           | 4         | 0.16856  | 0.87175  | 0.00733  |
|                  |           | 5         | 1.76457  | -0.45072 | 0.00717  |
| TS1 <sup>T</sup> |           | 1         | -2.22613 | 0.11759  | -0.07727 |
|                  |           | 2         | -0.42047 | -0.89533 | -0.04122 |
|                  |           | 3         | -2.16991 | 0.30430  | 1.26075  |
|                  |           | 4         | 1.38627  | 0.93707  | -0.00825 |
|                  |           | 5         | 1.00176  | -1.01772 | 0.00930  |
| P1 <sup>S</sup>  |           | 1         | -1.71450 | -0.38562 | -0.08526 |
|                  |           | 2         | 1.88132  | -0.58390 | -1.24319 |
|                  |           | 3         | -1.88145 | -0.58386 | 1.24319  |
|                  |           | 4         | -0.00006 | 0.84418  | -0.00001 |
|                  |           | 5         | 1.71456  | -0.38558 | 0.08526  |
| P1 <sup>T</sup>  |           | 1         | -2.04940 | -0.28098 | -0.07078 |
|                  |           | 2         | 0.50317  | -1.53395 | 0.07574  |
|                  |           | 3         | -2.29727 | 0.29644  | 1.12437  |
|                  |           | 4         | 0.58301  | 1.05538  | -0.02077 |
|                  |           | 5         | 1.57852  | -0.69706 | 0.01654  |

Table S2. Structure and coordinates of S<sub>2</sub> reacting with a H<sub>2</sub>S molecule optimized at the M06-2X/6-311++G(2d,2p) level. S and T denote the singlet and triplet states, respectively.

| Name             | Structure | Numbering | X        | Y        | Z        |
|------------------|-----------|-----------|----------|----------|----------|
| IM1 <sup>T</sup> |           | 1         | -2.55141 | -0.00713 | -0.00532 |
|                  |           | 2         | -1.68304 | 0.16053  | 0.99609  |
|                  |           | 3         | -1.57762 | -0.01866 | -0.91834 |
|                  |           | 4         | 1.37800  | -0.95263 | 0.00607  |
|                  |           | 5         | 1.37720  | 0.95089  | -0.00560 |
| TS1 <sup>S</sup> |           | 1         | -1.49858 | -0.36654 | -0.05525 |
|                  |           | 2         | -0.37563 | -1.18324 | -0.50411 |
|                  |           | 3         | -1.36683 | -0.89834 | 1.17653  |
|                  |           | 4         | 0.11275  | 1.01026  | 0.01005  |
|                  |           | 5         | 1.49473  | -0.51362 | 0.00317  |
| TS1 <sup>T</sup> |           | 1         | -1.83317 | -0.12941 | -0.07763 |
|                  |           | 2         | -0.28441 | -1.07909 | -0.04008 |
|                  |           | 3         | -1.86367 | -0.05292 | 1.25894  |
|                  |           | 4         | 0.74350  | 1.05645  | -0.00384 |
|                  |           | 5         | 1.22393  | -0.85629 | 0.00529  |
| P1 <sup>S</sup>  |           | 1         | 1.65858  | -0.38920 | -0.08461 |
|                  |           | 2         | -1.81868 | -0.55399 | -1.23429 |
|                  |           | 3         | 1.81909  | -0.55460 | 1.23417  |
|                  |           | 4         | -0.00001 | 0.84774  | 0.00004  |
|                  |           | 5         | -1.65859 | -0.38925 | 0.08458  |
| P1 <sup>T</sup>  |           | 1         | -1.97279 | -0.26730 | -0.07389 |
|                  |           | 2         | 0.44019  | -1.49825 | 0.03878  |
|                  |           | 3         | -2.10923 | 0.13299  | 1.19593  |
|                  |           | 4         | 0.55571  | 1.04076  | -0.01638 |
|                  |           | 5         | 1.52140  | -0.68813 | 0.01310  |

Table S3. Structure and coordinates of S<sub>2</sub> reacting with two H<sub>2</sub>S molecule optimized at the B3LYP/6-311++G(d,p) level. S and T denote the singlet and triplet states, respectively.

| Name             | Structure | Numbering | X        | Y        | Z        |
|------------------|-----------|-----------|----------|----------|----------|
| R2 <sup>S</sup>  |           | 1         | 1.17842  | -1.58838 | -0.52355 |
|                  |           | 2         | 1.43553  | -0.09502 | 0.71433  |
|                  |           | 3         | 0.16025  | 2.18205  | -0.21899 |
|                  |           | 4         | -0.98284 | 1.44513  | -0.29819 |
|                  |           | 5         | 0.48350  | 1.97156  | -1.51210 |
|                  |           | 6         | -2.51162 | -0.59331 | 0.06336  |
|                  |           | 7         | -2.29328 | -0.54401 | 1.39306  |
|                  |           | 8         | -1.40856 | -1.35824 | -0.14526 |
| R2 <sup>T</sup>  |           | 1         | -2.55254 | -0.13787 | 0.08951  |
|                  |           | 2         | -1.28131 | 1.30167  | -0.10907 |
|                  |           | 3         | 2.50931  | 1.41441  | -0.03734 |
|                  |           | 4         | 2.10860  | 0.12446  | 0.02702  |
|                  |           | 5         | 2.55833  | 1.53045  | 1.30490  |
|                  |           | 6         | 0.99005  | -2.39469 | 0.05003  |
|                  |           | 7         | 0.97783  | -2.61338 | -1.28027 |
|                  |           | 8         | -0.29284 | -1.97787 | 0.05822  |
| TS2 <sup>S</sup> |           | 1         | 0.73177  | 1.64642  | 0.39903  |
|                  |           | 2         | 1.45854  | 0.01030  | -0.55687 |
|                  |           | 3         | 0.29276  | -1.84179 | 0.23859  |
|                  |           | 4         | -1.05251 | -1.01400 | 0.13066  |
|                  |           | 5         | 0.46366  | -1.64314 | 1.56704  |
|                  |           | 6         | -2.24731 | 0.26479  | -0.09919 |
|                  |           | 7         | -2.14210 | 0.21422  | -1.44402 |
|                  |           | 8         | -1.04108 | 1.16739  | 0.04124  |
| TS2 <sup>T</sup> |           | 1         | -1.69294 | -1.00626 | 0.02230  |
|                  |           | 2         | -1.50355 | 0.97829  | -0.03040 |
|                  |           | 3         | 1.34840  | 1.71989  | -0.06677 |
|                  |           | 4         | 1.60320  | -0.05719 | 0.02527  |
|                  |           | 5         | 1.28270  | 1.84823  | 1.27563  |
|                  |           | 6         | 1.57161  | -1.60754 | 0.07028  |
|                  |           | 7         | 1.67228  | -1.71941 | -1.27076 |
|                  |           | 8         | -0.13463 | -1.42167 | 0.04315  |
| P2 <sup>S</sup>  |           | 1         | -0.67599 | 1.77644  | -0.42358 |
|                  |           | 2         | -1.13498 | 0.13032  | 0.80609  |
|                  |           | 3         | -1.05973 | -1.63506 | -0.36077 |
|                  |           | 4         | 2.01443  | -1.01408 | -0.75646 |
|                  |           | 5         | -2.30881 | -1.59444 | -0.87923 |
|                  |           | 6         | 2.72413  | -0.18313 | 0.03455  |
|                  |           | 7         | 1.96361  | -0.47001 | 1.11116  |
|                  |           | 8         | 0.67600  | 1.66139  | -0.37607 |
| P2 <sup>T</sup>  |           | 1         | -1.14164 | -1.71079 | -0.01121 |
|                  |           | 2         | -1.84532 | 0.18129  | 0.00582  |
|                  |           | 3         | 0.17885  | 2.25024  | -0.08770 |
|                  |           | 4         | 1.92685  | 0.46695  | 0.10761  |
|                  |           | 5         | -0.09755 | 2.43401  | 1.22145  |
|                  |           | 6         | 2.50884  | -0.76570 | 0.08789  |
|                  |           | 7         | 2.74066  | -0.70803 | -1.23933 |
|                  |           | 8         | 0.21832  | -1.47367 | -0.00654 |



Table S4. Structure and coordinates of S<sub>2</sub> reacting with two H<sub>2</sub>S molecule optimized at the M06-2X/6-311++G(2d,2p) level. S and T denote the singlet and triplet states, respectively.

| Name             | Structure                                                                           | Numbering | X        | Y        | Z        |
|------------------|-------------------------------------------------------------------------------------|-----------|----------|----------|----------|
| R2 <sup>S</sup>  | 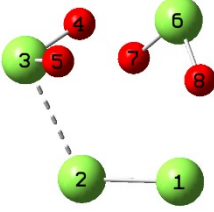   | 1         | 0.98574  | -1.62080 | -0.52744 |
|                  |                                                                                     | 2         | 1.23977  | -0.21614 | 0.78416  |
|                  |                                                                                     | 3         | 0.51623  | 1.98570  | -0.24283 |
|                  |                                                                                     | 4         | -0.69568 | 1.46022  | -0.51465 |
|                  |                                                                                     | 5         | 1.02860  | 1.66558  | -1.43609 |
|                  |                                                                                     | 6         | -2.53043 | -0.26711 | 0.03589  |
|                  |                                                                                     | 7         | -2.20220 | -0.10821 | 1.32237  |
|                  |                                                                                     | 8         | -1.51168 | -1.12403 | -0.16795 |
| R2 <sup>T</sup>  |    | 1         | -2.62994 | 0.30878  | 0.20352  |
|                  |                                                                                     | 2         | -0.96199 | 1.08995  | -0.28471 |
|                  |                                                                                     | 3         | 2.69010  | 1.18180  | 0.03612  |
|                  |                                                                                     | 4         | 2.17481  | -0.05504 | 0.04602  |
|                  |                                                                                     | 5         | 2.29306  | 1.41460  | 1.28993  |
|                  |                                                                                     | 6         | 0.64214  | -2.41448 | -0.00764 |
|                  |                                                                                     | 7         | 0.07457  | -2.09965 | -1.17584 |
|                  |                                                                                     | 8         | -0.38729 | -1.91668 | 0.68328  |
| TS2 <sup>S</sup> |   | 1         | 0.66175  | -1.62259 | -0.41357 |
|                  |                                                                                     | 2         | 1.37227  | -0.04220 | 0.62584  |
|                  |                                                                                     | 3         | 0.45237  | 1.70607  | -0.28443 |
|                  |                                                                                     | 4         | -0.92733 | 1.07716  | -0.19555 |
|                  |                                                                                     | 5         | 0.66305  | 1.36592  | -1.56653 |
|                  |                                                                                     | 6         | -2.26776 | -0.12568 | 0.09752  |
|                  |                                                                                     | 7         | -2.09687 | -0.05098 | 1.42259  |
|                  |                                                                                     | 8         | -1.13697 | -1.04172 | -0.06617 |
| TS2 <sup>T</sup> |  | 1         | -1.57280 | -1.12753 | 0.02353  |
|                  |                                                                                     | 2         | -1.52224 | 0.83766  | -0.03294 |
|                  |                                                                                     | 3         | 1.12034  | 1.80401  | -0.06288 |
|                  |                                                                                     | 4         | 1.56227  | 0.07539  | 0.01398  |
|                  |                                                                                     | 5         | 1.00654  | 1.87335  | 1.26836  |
|                  |                                                                                     | 6         | 1.70329  | -1.45200 | 0.06825  |
|                  |                                                                                     | 7         | 1.77331  | -1.54600 | -1.26384 |
|                  |                                                                                     | 8         | 0.00065  | -1.39683 | 0.04611  |
| P2 <sup>S</sup>  |  | 1         | 0.75317  | -1.70154 | -0.42492 |
|                  |                                                                                     | 2         | 1.13848  | -0.08151 | 0.80204  |
|                  |                                                                                     | 3         | 0.91290  | 1.62019  | -0.36431 |
|                  |                                                                                     | 4         | -1.93418 | 0.74559  | -0.85902 |
|                  |                                                                                     | 5         | 2.13918  | 1.63592  | -0.90123 |
|                  |                                                                                     | 6         | -2.66589 | 0.09138  | 0.05060  |
|                  |                                                                                     | 7         | -1.83914 | 0.44506  | 1.04196  |
|                  |                                                                                     | 8         | -0.58433 | -1.68290 | -0.29639 |
| P2 <sup>T</sup>  |  | 1         | -0.84959 | -1.63891 | -0.06932 |
|                  |                                                                                     | 2         | -2.08420 | -0.09537 | 0.08419  |
|                  |                                                                                     | 3         | -0.25983 | 1.97142  | -0.12953 |
|                  |                                                                                     | 4         | 2.11355  | 0.72573  | 0.25799  |
|                  |                                                                                     | 5         | -0.65809 | 2.31130  | 1.10204  |
|                  |                                                                                     | 6         | 2.89358  | -0.35576 | 0.11170  |
|                  |                                                                                     | 7         | 3.01319  | -0.15921 | -1.20431 |
|                  |                                                                                     | 8         | 0.33207  | -0.97980 | -0.10841 |

Table S5. Thermodynamic parameters of S<sub>2</sub> reacting with H<sub>2</sub>S calculated with B3LYP/6-311++G(d,p). (Values in the parentheses are in triplet state.)

|               | R1           | IM1          | TS1          | P1           | R2           | TS2          | P2           |
|---------------|--------------|--------------|--------------|--------------|--------------|--------------|--------------|
| S (cal/mol·K) | 101.5930     | -            | 70.4070      | 70.9130      | 95.2130      | 83.2820      | 94.3320      |
|               | (103.7690)   | (86.2430)    | (78.1540)    | (80.3930)    | (108.0650)   | (89.0300)    | (97.79600)   |
| U (Hartree)   | -1195.7810   | -            | -1195.7592   | -1195.8334   | -1595.1996   | -1595.1940   | -1595.2428   |
|               | (-1195.8171) | (-1195.8170) | (-1195.7725) | (-1195.7751) | (-1595.2248) | (-1595.1830) | (-1595.1876) |
| H (Hartree)   | -1195.7791   | -            | -1195.7582   | -1195.8324   | -1595.1999   | -1595.1931   | -1595.2419   |
|               | (-1195.8152) | (-1195.8161) | (-1195.7715) | (-1195.7742) | (-1595.2239) | (-1595.1821) | (-1595.1867) |
| G (Hartree)   | -1195.8273   | -            | -1195.7917   | -1195.8661   | -1595.2439   | -1595.2326   | -1595.2867   |
|               | (-1195.8645) | (-1195.8571) | (-1195.8087) | (-1195.8124) | (-1595.2752) | (-1595.2244) | (-1595.2332) |

Table S6. Thermodynamic parameters of S<sub>2</sub> reacting with H<sub>2</sub>S calculated with CCSD(T)/aug-cc-pVQZ on the B3LYP/6-311++G(d,p) optimized structures. (Values in the parentheses are in triplet state.)

|               | R1                         | IM1               | TS1                        | P1                         | R2                         | TS2                        | P2                         |
|---------------|----------------------------|-------------------|----------------------------|----------------------------|----------------------------|----------------------------|----------------------------|
| S (cal/mol·K) | 101.5930<br>(103.7690)     | -<br>(86.2430)    | 70.4070<br>(78.1540)       | 70.9130<br>(80.3930)       | 95.213<br>(108.0650)       | 83.2820<br>(89.0300)       | 94.3320<br>(97.7960)       |
| U (Hartree)   | -1194.4023<br>(-1194.4293) | -<br>(-1194.4289) | -1194.3560<br>(-1194.3754) | -1194.4550<br>(-1194.3814) | -1593.3470<br>(-1593.3696) | -1593.3408<br>(-1593.3124) | -1593.3975<br>(-1593.3241) |
| H (Hartree)   | -1194.4004<br>(-1194.4274) | -<br>(-1194.4280) | -1194.3550<br>(-1194.3744) | -1194.4540<br>(-1194.3804) | -1593.3461<br>(-1593.3687) | -1593.3398<br>(-1593.3115) | -1593.3966<br>(-1593.3232) |
| G (Hartree)   | -1194.4486<br>(-1194.4767) | -<br>(-1194.4689) | -1194.3885<br>(-1194.4116) | -1194.4877<br>(-1194.4186) | -1593.3913<br>(-1593.4200) | -1593.3794<br>(-1593.3538) | -1593.4414<br>(-1593.3696) |

Table S7. Thermodynamic parameters of S<sub>2</sub> reacting with H<sub>2</sub>S calculated with CCSD(T)/aug-cc-pVTZ on the B3LYP/6-311++G(d,p) optimized structures. (Values in the parentheses are in triplet state.)

|               | R1                         | IM1               | TS1                        | P1                         | R2                         | TS2                        | P2                         |
|---------------|----------------------------|-------------------|----------------------------|----------------------------|----------------------------|----------------------------|----------------------------|
| S (cal/mol·K) | 101.5930<br>(103.7690)     | -<br>(86.2430)    | 70.4070<br>(78.1540)       | 70.9130<br>(80.3930)       | 95.2130<br>(108.0650)      | 83.2820<br>(89.0300)       | 94.3320<br>(97.7960)       |
| U (Hartree)   | -1194.3543<br>(-1194.3819) | -<br>(-1194.3816) | -1194.3072<br>(-1194.3288) | -1194.4054<br>(-1194.3344) | -1593.2827<br>(-1593.3062) | -1593.2755<br>(-1593.3124) | -1593.3318<br>(-1593.2612) |
| H (Hartree)   | -1194.3524<br>(-1194.3800) | -<br>(-1194.3907) | -1194.3063<br>(-1194.3278) | -1194.4044<br>(-1194.3335) | -1593.2817<br>(-1593.3053) | -1593.3398<br>(-1593.3115) | -1593.3308<br>(-1593.2602) |
| G (Hartree)   | -1194.4006<br>(-1194.4293) | -<br>(-1194.4216) | -1194.3397<br>(-1194.3650) | -1194.4381<br>(-1194.3717) | -1593.3270<br>(-1593.3566) | -1593.3794<br>(-1593.3538) | -1593.3757<br>(-1593.3067) |

Table S8. Thermodynamic parameters of S<sub>2</sub> reacting with H<sub>2</sub>S calculated with M06-2X/6-311++G(2d,2p). (Values in the parentheses are in triplet state.)

|               | R1                         | IM1               | TS1                        | P1                         | R2                         | TS2                        | P2                         |
|---------------|----------------------------|-------------------|----------------------------|----------------------------|----------------------------|----------------------------|----------------------------|
| S (cal/mol·K) | 101.3930<br>(103.5790)     | -<br>(84.6600)    | 69.9230<br>(74.8770)       | 72.5170<br>(79.0650)       | 93.8460<br>(94.2280)       | 82.8970<br>(90.3860)       | 91.5780<br>(99.0180)       |
| U (Hartree)   | -1195.6768<br>(-1195.7108) | -<br>(-1195.7102) | -1195.6658<br>(-1195.6630) | -1195.7395<br>(-1195.6671) | -1595.0502<br>(-1595.0760) | 1595.0511<br>(-1595.0266)  | -1595.1045<br>(-1595.0334) |
| H (Hartree)   | -1195.6749<br>(-1195.7089) | -<br>(-1195.7092) | -1195.6648<br>(-1195.6621) | -1195.7385<br>(-1195.6661) | -1595.0493<br>(-1595.0751) | -1595.0501<br>(-1595.0257) | -1595.1036<br>(-1595.0325) |
| G (Hartree)   | -1195.7231<br>(-1195.7581) | -<br>(-1195.7494) | -1195.6981<br>(-1195.6977) | -1195.7730<br>(-1195.7037) | -1595.0936<br>(-1595.1199) | -1595.0895<br>(-1595.0686) | -1595.1471<br>(-1595.0795) |

Table S9. Thermodynamic parameters of S<sub>2</sub> reacting with H<sub>2</sub>S calculated with CCSD(T)/aug-cc-pVQZ on the M06-2X/6-311++G(2d,2p) optimized structures. (Values in the parentheses are in triplet state.)

|               | R1                         | IM1               | TS1                        | P1                         | R2                         | TS2                        | P2                         |
|---------------|----------------------------|-------------------|----------------------------|----------------------------|----------------------------|----------------------------|----------------------------|
| S (cal/mol·K) | 101.3930<br>(103.5790)     | -<br>(84.6600)    | 69.9230<br>(74.8770)       | 72.5170<br>(79.0650)       | 93.8460<br>(94.2280)       | 82.8970<br>(90.3860)       | 91.5780<br>(99.0180)       |
| U (Hartree)   | -1194.4044<br>(-1194.4319) | -<br>(-1194.4353) | -1194.3896<br>(-1194.3778) | -1194.4567<br>(-1194.3823) | -1593.3463<br>(-1593.3712) | -1593.3445<br>(-1593.3148) | -1593.3986<br>(-1593.3249) |
| H (Hartree)   | -1194.4010<br>(-1194.4285) | -<br>(-1194.4279) | -1194.3844<br>(-1194.3768) | -1194.4558<br>(-1194.3813) | -1593.3453<br>(-1593.3702) | -1593.3435<br>(-1593.3138) | -1593.3976<br>(-1593.3240) |
| G (Hartree)   | -1194.4482<br>(-1194.4767) | -<br>(-1194.4681) | -1194.4177<br>(-1194.4124) | -1194.4902<br>(-1194.4189) | -1593.3896<br>(-1593.4150) | -1593.3829<br>(-1593.3568) | -1593.4411<br>(-1593.3710) |

Table S10. Thermodynamic parameters of S<sub>2</sub> reacting with H<sub>2</sub>S calculated with CCSD(T)/aug-cc-pVTZ on the M06-2X/6-311++G(2d,2p) optimized structures. (Values in the parentheses are in triplet state.)

|               | R1                         | IM1               | TS1                        | P1                         | R2                         | TS2                        | P2                         |
|---------------|----------------------------|-------------------|----------------------------|----------------------------|----------------------------|----------------------------|----------------------------|
| S (cal/mol·K) | 101.3930<br>(103.5790)     | -<br>(84.6600)    | 69.9230<br>(74.8770)       | 72.5170<br>(79.0650)       | 93.8460<br>(94.2280)       | 82.8970<br>(90.3860)       | 91.5780<br>(99.0180)       |
| U (Hartree)   | -1194.3535<br>(-1194.3815) | -<br>(-1194.3811) | -1194.3349<br>(-1194.3301) | -1194.4063<br>(-1194.3347) | -1593.2819<br>(-1593.3072) | -1593.2780<br>(-1593.2508) | -1593.3320<br>(-1593.2611) |
| H (Hartree)   | -1194.3516<br>(-1194.3796) | -<br>(-1194.3802) | -1194.3339<br>(-1194.3292) | -1194.4053<br>(-1194.3338) | -1593.2799<br>(-1593.3063) | -1593.2770<br>(-1593.2499) | -1593.3311<br>(-1593.2602) |
| G (Hartree)   | -1194.3998<br>(-1194.4289) | -<br>(-1194.4204) | -1194.3671<br>(-1194.3647) | -1194.4398<br>(-1194.3713) | -1593.3242<br>(-1593.3510) | -1593.3164<br>(-1593.2928) | -1593.3746<br>(-1593.3072) |

Table S11. Thermodynamic parameters of S<sub>2</sub> reacting with H<sub>2</sub>S calculated with CCSD(T)/CBS on the M06-2X/6-311++G(2d,2p) optimized structures. (Values in the parentheses are in triplet state.)

|               | R1                         | IM1               | TS1                        | P1                         | R2                         | TS2                        | P2                         |
|---------------|----------------------------|-------------------|----------------------------|----------------------------|----------------------------|----------------------------|----------------------------|
| S (cal/mol·K) | 101.3930<br>(103.5790)     | -<br>(84.6600)    | 69.9230<br>(74.8770)       | 72.5170<br>(79.0650)       | 93.8460<br>(94.2280)       | 82.8970<br>(90.3860)       | 91.5780<br>(99.0180)       |
| U (Hartree)   | -1194.4163<br>(-1194.4436) | -<br>(-1194.4429) | -1194.4003<br>(-1194.3919) | -1194.4716<br>(-1194.3964) | -1593.3653<br>(-1593.3898) | -1593.3639<br>(-1593.3335) | -1593.4180<br>(-1593.3435) |
| H (Hartree)   | -1194.4144<br>(-1194.4417) | -<br>(-1194.4420) | -1194.3994<br>(-1194.3909) | -1194.4707<br>(-1194.3953) | -1593.3644<br>(-1593.3889) | -1593.3630<br>(-1593.3326) | -1593.4170<br>(-1593.3426) |
| G (Hartree)   | -1194.4625<br>(-1194.4909) | -<br>(-1194.4822) | -1194.4326<br>(-1194.4265) | -1194.5051<br>(-1194.4329) | -1593.4087<br>(-1593.4337) | -1593.4024<br>(-1593.3755) | -1593.4605<br>(-1593.3896) |



Table S12. Structure and coordinates of S<sub>4</sub> reacting with H<sub>2</sub>S molecule optimized at the M06-2X/6-311++G(2d,2p) level.

| Name | Structure | Numbering | X        | Y        | Z        |
|------|-----------|-----------|----------|----------|----------|
| IM3  |           | 1         | -0.55245 | 1.18173  | -0.86047 |
|      |           | 2         | -1.17393 | -0.78005 | -0.89159 |
|      |           | 3         | -0.15245 | 1.64795  | 0.95142  |
|      |           | 4         | -1.12612 | -1.43978 | 0.91077  |
|      |           | 5         | 2.69434  | -0.44424 | -0.11662 |
|      |           | 6         | 1.78803  | -1.04269 | 0.66330  |
|      |           | 7         | 3.18163  | -1.60704 | -0.55948 |
| TS3  |           | 1         | -0.25313 | 1.64354  | -0.27385 |
|      |           | 2         | -1.72853 | 0.10700  | -0.52094 |
|      |           | 3         | 1.14581  | 0.91514  | 0.82172  |
|      |           | 4         | -1.19724 | -1.44731 | 0.61776  |
|      |           | 5         | 1.90725  | -1.09016 | -0.53286 |
|      |           | 6         | 0.55894  | -1.52439 | -0.12951 |
|      |           | 7         | 1.45440  | -0.52706 | -1.65974 |
| P3   |           | 1         | -0.00217 | 1.24909  | 0.32682  |
|      |           | 2         | -1.33322 | 0.29956  | -0.94217 |
|      |           | 3         | 1.30467  | -0.23327 | 0.94799  |
|      |           | 4         | -2.68454 | -0.67986 | 0.28053  |
|      |           | 5         | 2.62126  | -0.54788 | -0.61925 |
|      |           | 6         | -1.99010 | -1.81961 | 0.40020  |
|      |           | 7         | 3.49394  | 0.41737  | -0.30283 |

Table S13. Structure and coordinates of  $S_6$  reacting with  $H_2S$  molecule optimized at the M06-2X/6-311++G(2d,2p) level.

| Name | Structure                                                                           | Numbering | X        | Y        | Z        |
|------|-------------------------------------------------------------------------------------|-----------|----------|----------|----------|
| IM4  | 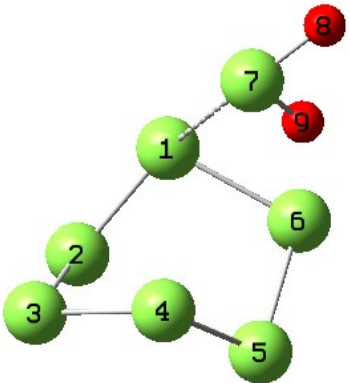   | 1         | 0.03036  | -1.18139 | 1.18860  |
|      |                                                                                     | 2         | 1.95993  | -0.52873 | 0.98906  |
|      |                                                                                     | 3         | 1.68201  | 1.51612  | 0.54365  |
|      |                                                                                     | 4         | 0.01537  | 1.45513  | -0.75068 |
|      |                                                                                     | 5         | 0.42550  | -0.17510 | -1.91264 |
|      |                                                                                     | 6         | -0.43194 | -1.75383 | -0.78750 |
|      |                                                                                     | 7         | -3.23182 | 0.67239  | 0.69978  |
|      |                                                                                     | 8         | -4.47708 | 0.20703  | 0.55834  |
|      |                                                                                     | 9         | -2.71339 | -0.28046 | -0.08252 |
| TS4  |   | 1         | -0.29811 | 1.30973  | -0.91613 |
|      |                                                                                     | 2         | -2.14459 | 0.80338  | -0.65008 |
|      |                                                                                     | 3         | -2.05838 | -1.13124 | 0.20524  |
|      |                                                                                     | 4         | -0.19880 | -1.19143 | 1.19236  |
|      |                                                                                     | 5         | 1.23706  | -1.88778 | -0.11850 |
|      |                                                                                     | 6         | 2.23062  | -0.35783 | -0.99569 |
|      |                                                                                     | 7         | 1.01270  | 2.17783  | 1.20133  |
|      |                                                                                     | 8         | 1.66651  | 3.20132  | 0.63440  |
|      |                                                                                     | 9         | 1.84546  | 1.23617  | 0.66926  |
| P4   |  | 1         | -2.06350 | 0.27920  | -0.78533 |
|      |                                                                                     | 2         | -1.62200 | -1.54018 | 0.10648  |
|      |                                                                                     | 3         | 0.31187  | -2.03401 | -0.41586 |
|      |                                                                                     | 4         | 1.54468  | -1.02367 | 0.92271  |
|      |                                                                                     | 5         | 2.53857  | 0.36833  | -0.23576 |
|      |                                                                                     | 6         | 1.29769  | 2.01135  | -0.44603 |
|      |                                                                                     | 7         | -1.90958 | 1.67755  | 0.73710  |
|      |                                                                                     | 8         | -3.17703 | 1.56957  | 1.15849  |
|      |                                                                                     | 9         | 1.61346  | 2.61304  | 0.70873  |

Table S14. Structure and coordinates of S<sub>8</sub> reacting with H<sub>2</sub>S molecule optimized at the M06-2X/6-311++G(2d,2p) level.

| Name | Structure | Numbering | X        | Y        | Z        |
|------|-----------|-----------|----------|----------|----------|
| IM5  |           | 1         | 2.51784  | 0.29337  | -1.13277 |
|      |           | 2         | 1.86305  | 1.91464  | -0.03814 |
|      |           | 3         | -0.21978 | 1.88995  | -0.24848 |
|      |           | 4         | -1.03960 | 1.28822  | 1.51111  |
|      |           | 5         | -2.23946 | -1.62600 | -0.06782 |
|      |           | 6         | -0.38672 | -1.82164 | -0.55251 |
|      |           | 7         | 0.78169  | -1.31456 | 1.11619  |
|      |           | 8         | 2.63079  | -1.32427 | 0.18985  |
|      |           | 9         | -3.46244 | 0.61355  | -0.79532 |
|      |           | 10        | -2.67305 | 1.12508  | 0.25135  |
|      |           | 11        | -4.45268 | 0.26295  | 0.03505  |
| TS5  |           | 1         | 2.51784  | 0.29337  | -1.13277 |
|      |           | 2         | 1.86305  | 1.91464  | -0.03814 |
|      |           | 3         | -0.21978 | 1.88995  | -0.24848 |
|      |           | 4         | -1.03960 | 1.28822  | 1.51111  |
|      |           | 5         | -2.23946 | -1.62600 | -0.06782 |
|      |           | 6         | -0.38672 | -1.82164 | -0.55251 |
|      |           | 7         | 0.78169  | -1.31456 | 1.11619  |
|      |           | 8         | 2.63079  | -1.32427 | 0.18985  |
|      |           | 9         | -3.46244 | 0.61355  | -0.79532 |
|      |           | 10        | -2.67305 | 1.12508  | 0.25135  |
|      |           | 11        | -4.45268 | 0.26295  | 0.03505  |
| P5   |           | 1         | 0.86260  | -1.28955 | -1.43266 |
|      |           | 2         | 2.60694  | -0.50672 | -0.63105 |
|      |           | 3         | 2.13265  | 1.45265  | -0.14659 |
|      |           | 4         | 1.68809  | 1.51601  | 1.86819  |
|      |           | 5         | -2.13237 | 1.45281  | 0.14696  |
|      |           | 6         | -2.60704 | -0.50664 | 0.63066  |
|      |           | 7         | -0.86297 | -1.28984 | 1.43249  |
|      |           | 8         | -0.00016 | -2.50616 | -0.00020 |
|      |           | 9         | -1.68775 | 1.51694  | -1.86781 |
|      |           | 10        | 0.37115  | 1.28421  | 1.75058  |
|      |           | 11        | -0.37102 | 1.28393  | -1.75035 |

Table S15. Thermodynamic parameters of S<sub>4</sub> reacting with H<sub>2</sub>S calculated with M06-2X/6-311++G(2d,2p).

|               | R3         | IM3        | TS3        | P3         |
|---------------|------------|------------|------------|------------|
| S (cal/mol·K) | 123.0590   | 91.5900    | 86.7710    | 89.3200    |
| U (Hartree)   | -1992.0745 | -1992.0777 | -1992.0564 | -1992.1237 |
| H (Hartree)   | -1992.0726 | -1992.0767 | -1992.0554 | -1992.1228 |
| G (Hartree)   | -1992.1311 | -1992.1202 | -1992.0967 | -1992.1652 |

Table S16. Thermodynamic parameters of S<sub>4</sub> reacting with H<sub>2</sub>S calculated with CCSD(T)/aug-cc-pVTZ on the M06-2X/6-311++G(2d,2p) optimized structures.

|               | R3         | IM3        | TS3        | P3         |
|---------------|------------|------------|------------|------------|
| S (cal/mol·K) | 123.0590   | 91.5900    | 86.7710    | 89.3200    |
| U (Hartree)   | -1989.8668 | -1989.8696 | -1989.8696 | -1989.8552 |
| H (Hartree)   | -1989.8649 | -1989.8686 | -1989.8686 | -1989.8976 |
| G (Hartree)   | -1989.9234 | -1989.9121 | -1989.8822 | -1989.9400 |

Table S17. Thermodynamic parameters of S<sub>6</sub> reacting with H<sub>2</sub>S calculated with M06-2X/6-311++G(2d,2p).

|               | R4         | IM4        | TS4        | P4         |
|---------------|------------|------------|------------|------------|
| S (cal/mol·K) | 133.6690   | 106.9400   | 105.6170   | 104.4290   |
| U (Hartree)   | -2788.5058 | -2788.4865 | -2788.4193 | -2788.5076 |
| H (Hartree)   | -2788.5039 | -2788.4856 | -2788.4184 | -2788.5066 |
| G (Hartree)   | -2788.5674 | -2788.5364 | -2788.4686 | -2788.5563 |

Table S18. Thermodynamic parameters of S<sub>6</sub> reacting with H<sub>2</sub>S calculated with CCSD(T)/aug-cc-pVTZ on the M06-2X/6-311++G(2d,2p) optimized structures.

|               | R4         | IM4        | TS4        | P4         |
|---------------|------------|------------|------------|------------|
| S (cal/mol·K) | 133.6690   | 106.9400   | 105.6170   | 104.4290   |
| U (Hartree)   | -2785.3933 | -2785.3756 | -2785.3196 | -2785.3914 |
| H (Hartree)   | -2785.3914 | -2785.3747 | -2785.3186 | -2785.3905 |
| G (Hartree)   | -2785.4549 | -2785.4255 | -2785.3688 | -2785.4401 |

Table S19. Thermodynamic parameters of S<sub>8</sub> reacting with H<sub>2</sub>S calculated with M06-2X/6-311++G(2d,2p).

|               | R5         | IM5        | TS5        | P5         |
|---------------|------------|------------|------------|------------|
| S (cal/mol·K) | -148.9340  | 121.4350   | 119.0410   | 115.8910   |
| U (Hartree)   | -3584.9002 | -3584.8869 | -3584.8036 | -3584.8987 |
| H (Hartree)   | -3584.8983 | -3584.8859 | -3584.8026 | -3584.8977 |
| G (Hartree)   | -3584.9691 | -3584.9436 | -3584.8694 | -3584.9516 |



Table S20. Thermodynamic parameters of S<sub>8</sub> reacting with H<sub>2</sub>S calculated with CCSD(T)/aug-cc-pVTZ on the M06-2X/6-311++G(2d,2p) optimized structures.

|               | R4         | IM4        | TS4        | P4         |
|---------------|------------|------------|------------|------------|
| S (cal/mol·K) | 148.9340   | 121.4350   | 119.0410   | 115.8910   |
| U (Hartree)   | -3580.8960 | -3580.8836 | -3580.8064 | -3580.8954 |
| H (Hartree)   | -3580.8942 | -3580.8827 | -3580.8036 | -3580.8925 |
| G (Hartree)   | -3580.9649 | -3580.9404 | -3579.0646 | -3580.9474 |
